# Supplementary material
Source: MDPI journal article supplement (https://www.mdpi.com/2073-4344/13/1/114)
Supplement: s1 [file s1]

## Supplementary Materials

### **The Influence of Cerium to Manganese Ratio and Preparation Method on the Activity of Ceria-Manganese Mixed Metal Oxide Catalysts for VOC Total Oxidation**

Parag M. Shah, Liam A. Bailey, Stuart H. Taylor \*

Cardiff Catalysis Institute, School of Chemistry, Cardiff University, Main Building, Park Place, Cardiff, CF10 3AT, UK.

\* Corresponding author: [taylorsh@cardiff.ac.uk](mailto:taylorsh@cardiff.ac.uk)

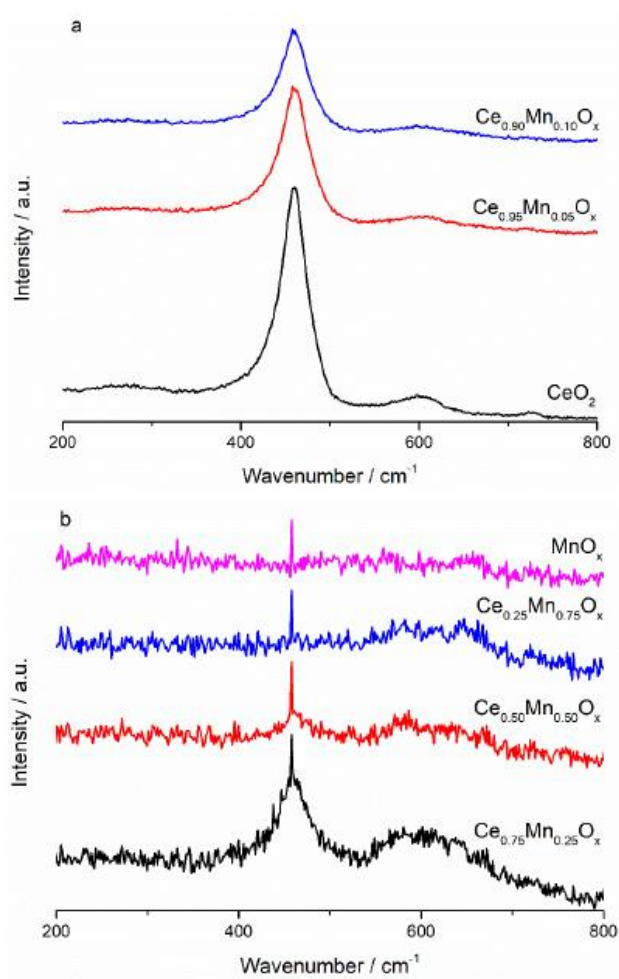

**Figure S1.** Raman spectra of cerium-manganese mixed metal oxides prepared by sodium carbonate co-precipitation. Laser wavelength = 514 nm.

i.

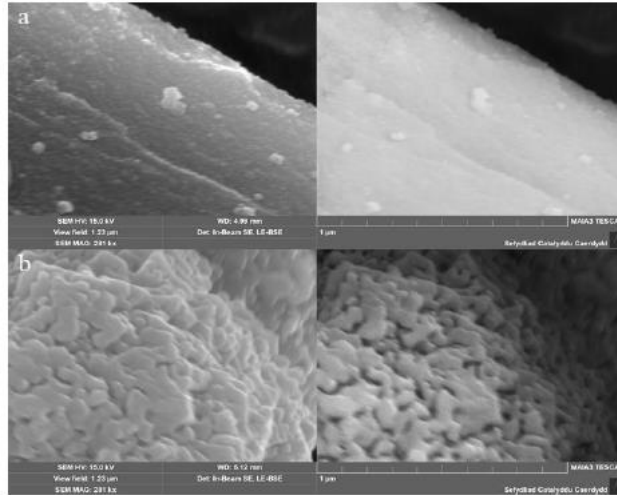

ii.

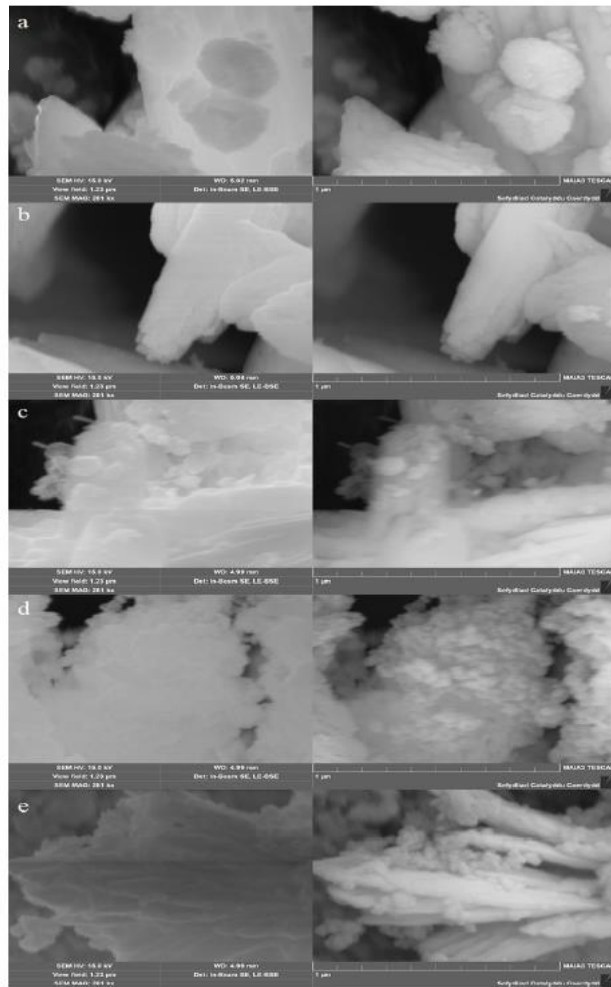

**Figure S2:** i. SEM images of (a.)  $\text{CeO}_2$  and (b.)  $\text{MnO}_x$  prepared via sodium carbonate co-precipitation. ii. SEM images of (a.)  $\text{Ce}_{0.95}\text{Mn}_{0.05}\text{O}_x$ , (b.)  $\text{Ce}_{0.9}\text{Mn}_{0.1}\text{O}_x$ , (c.)  $\text{Ce}_{0.75}\text{Mn}_{0.25}\text{O}_x$ , (d.)  $\text{Ce}_{0.5}\text{Mn}_{0.5}\text{O}_x$  and (e.)  $\text{Ce}_{0.25}\text{Mn}_{0.75}\text{O}_x$ . Left image obtained using secondary electrons, right image obtained using backscattered electrons

i.

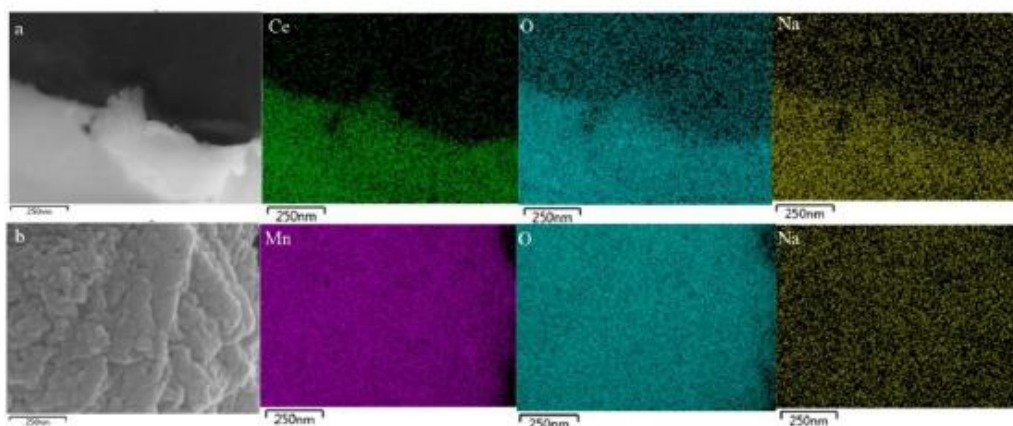

ii.

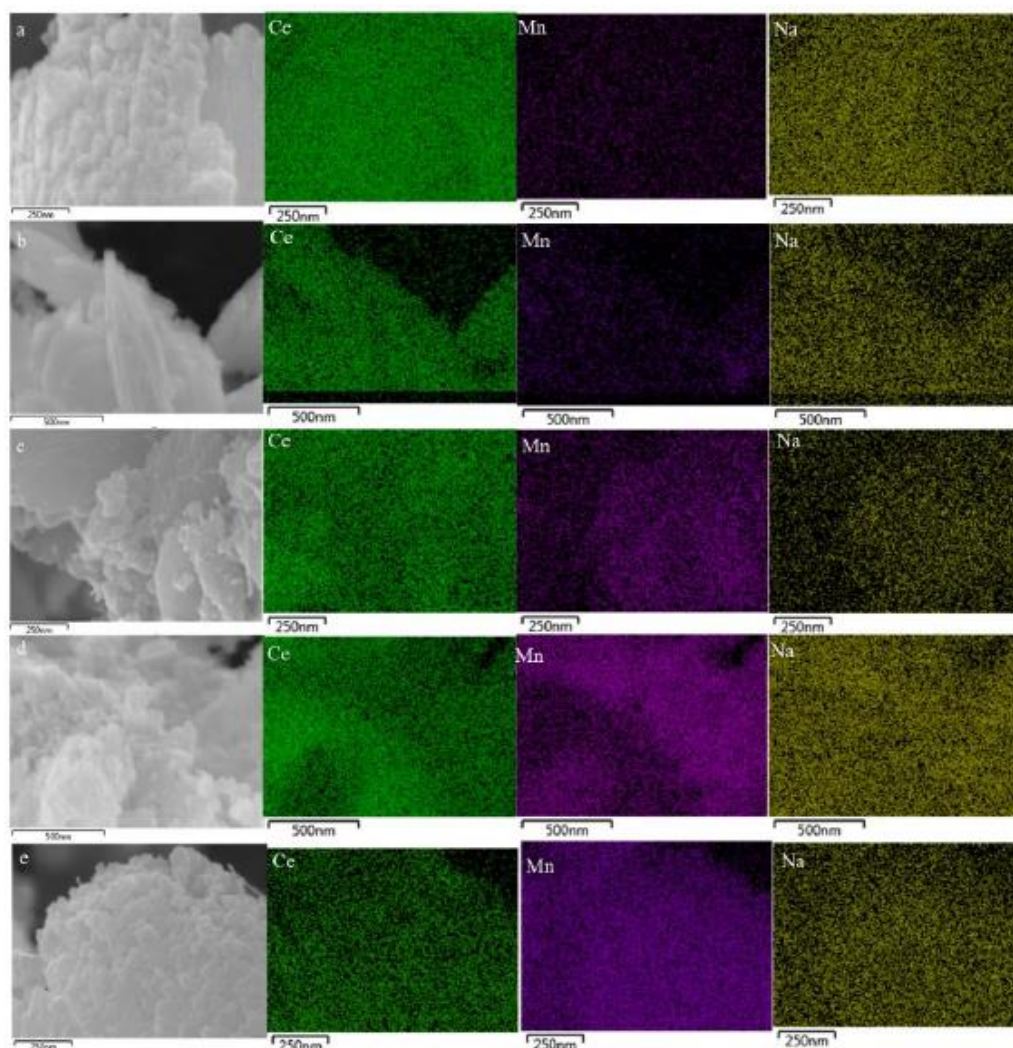

**Figure S3:** i. SEM-EDX images of (a.)  $\text{CeO}_2$  and (b.)  $\text{MnO}_x$  prepared via sodium carbonate co-precipitation. ii. SEM-EDX images of (a.)  $\text{Ce}_{0.95}\text{Mn}_{0.05}\text{O}_x$ , (b.)  $\text{Ce}_{0.9}\text{Mn}_{0.1}\text{O}_x$ , (c.)  $\text{Ce}_{0.75}\text{Mn}_{0.25}\text{O}_x$ , (d.)  $\text{Ce}_{0.5}\text{Mn}_{0.5}\text{O}_x$  and (e.)  $\text{Ce}_{0.25}\text{Mn}_{0.75}\text{O}_x$ . Left image obtained using secondary electrons, right image obtained using backscattered electrons

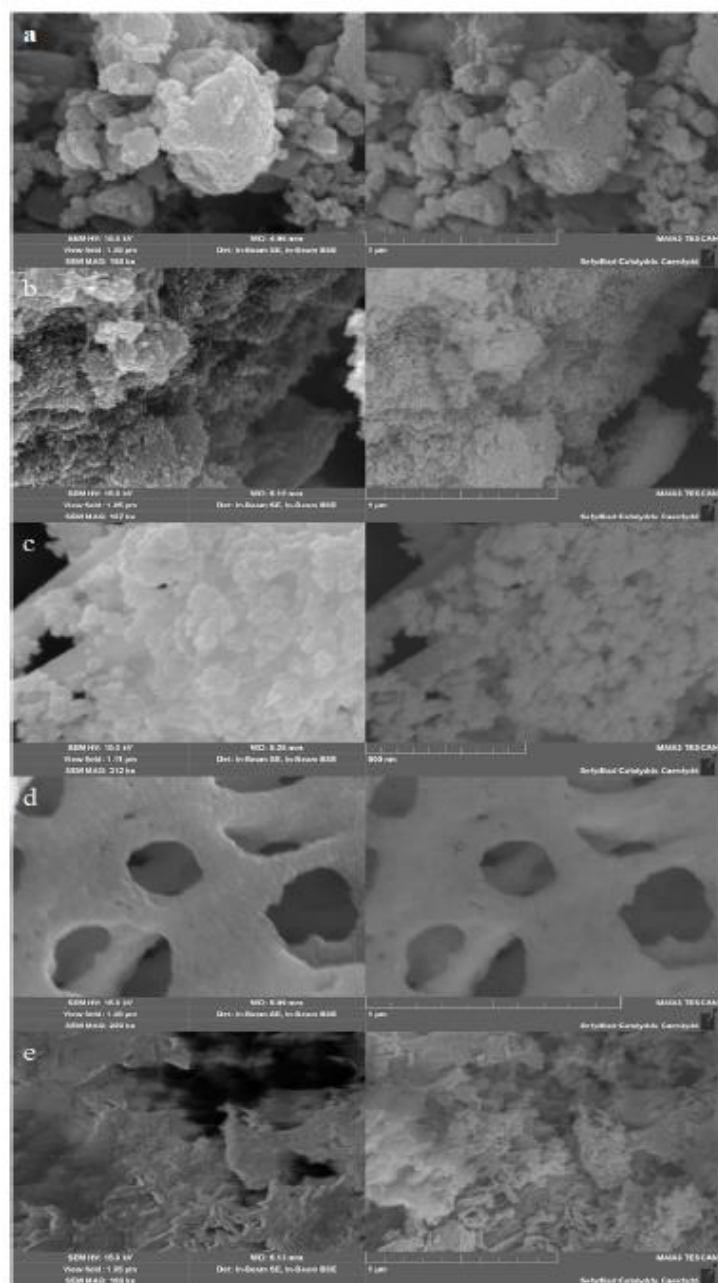

**Figure S4:** SEM images of  $\text{Ce}_{0.25}\text{Mn}_{0.75}\text{O}_x$  prepared by (a) ball mill- $\text{CO}_3$ , (b) ball mill-  $\text{NO}_3$ , (c) urea, (d) citric acid and (e) oxalic acid. Left image obtained using secondary electrons, right image obtained using backscattered electrons.



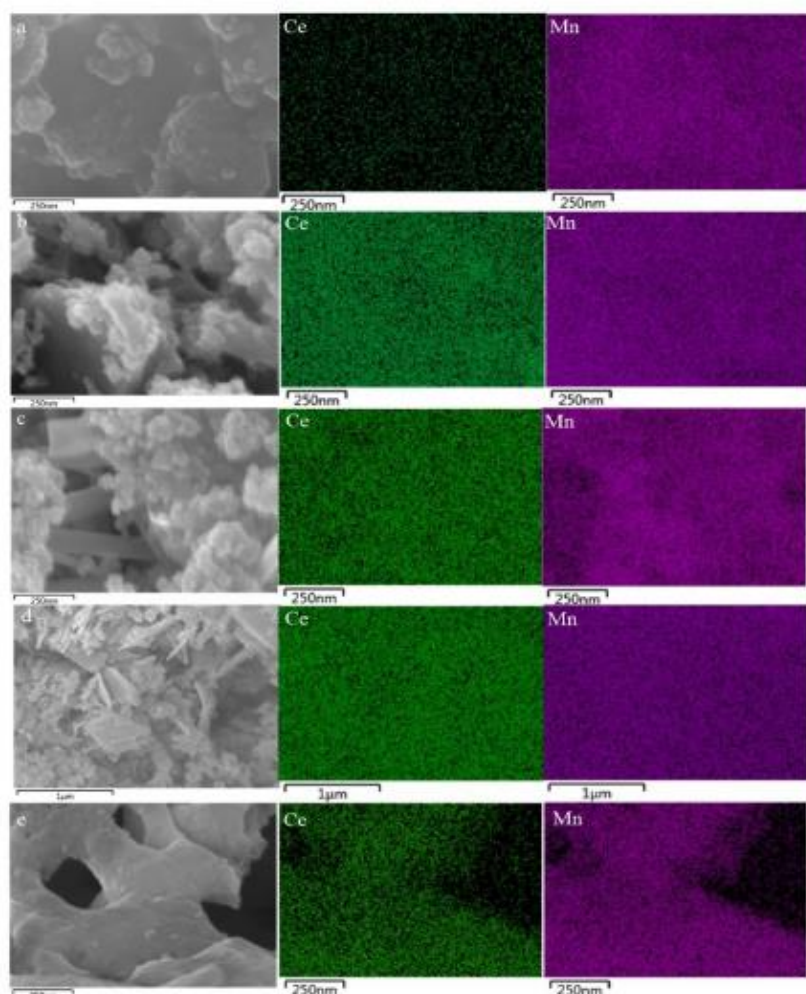

**Figure S5:** SEM-EDX mapping of  $\text{Ce}_{0.25}\text{Mn}_{0.75}\text{O}_x$  prepared by (a) ball mill- $\text{CO}_3$ , (b) ball mill-  $\text{NO}_3$ , (c) urea, (d) oxalic acid and (e) citric acid. Cerium (green) and manganese (pink).

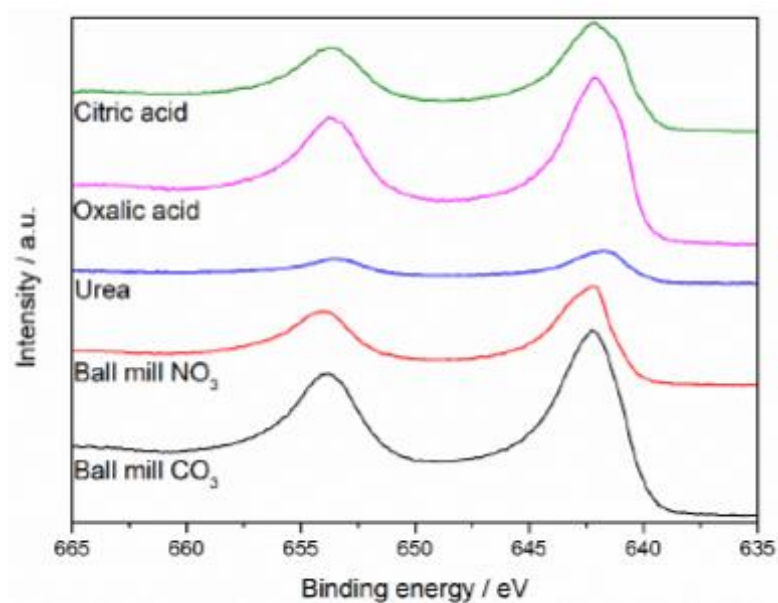

**Figure S6:** Mn 2p XPS spectra of the  $\text{Ce}_{0.25}\text{Mn}_{0.75}\text{O}_x$  catalysts prepared by different methods.

**Table S1:** Rate of reaction normalised to surface area for ceria-manganese mixed metal oxides prepared by sodium carbonate coprecipitation

| Catalyst                                             | Surface area normalised propane total oxidation rate at 350 °C ( $10^{-7}$ ) ( $\text{mol s}^{-1} \text{m}^{-2}$ ) | Surface area normalised naphthalene total oxidation rate at 175 °C ( $10^{-11}$ ) ( $\text{mol s}^{-1} \text{m}^{-2}$ ) |
|------------------------------------------------------|--------------------------------------------------------------------------------------------------------------------|-------------------------------------------------------------------------------------------------------------------------|
| CeO <sub>2</sub>                                     | 0.06                                                                                                               | 0.45                                                                                                                    |
| Ce <sub>0.95</sub> Mn <sub>0.05</sub> O <sub>x</sub> | 0.09                                                                                                               | 0.31                                                                                                                    |
| Ce <sub>0.9</sub> Mn <sub>0.1</sub> O <sub>x</sub>   | 0.16                                                                                                               | 0.40                                                                                                                    |
| Ce <sub>0.75</sub> Mn <sub>0.25</sub> O <sub>x</sub> | 0.47                                                                                                               | 0.59                                                                                                                    |
| Ce <sub>0.5</sub> Mn <sub>0.5</sub> O <sub>x</sub>   | 0.41                                                                                                               | 1.07                                                                                                                    |
| Ce <sub>0.25</sub> Mn <sub>0.75</sub> O <sub>x</sub> | 0.74                                                                                                               | 1.93                                                                                                                    |
| MnO <sub>x</sub>                                     | 1.03                                                                                                               | 3.44                                                                                                                    |

**Table S2:** XPS derived surface elemental concentrations for ceria-manganese mixed metal oxide catalysts prepared by co-precipitation with sodium carbonate.

| Catalyst                                             | Relative surface Ce concentration (%) | Relative surface Mn concentration (%) | Surface Na concentration (%) |
|------------------------------------------------------|---------------------------------------|---------------------------------------|------------------------------|
| CeO <sub>2</sub>                                     | 100.0                                 | 0.0                                   | 14.2                         |
| Ce <sub>0.95</sub> Mn <sub>0.05</sub> O <sub>x</sub> | 97.4                                  | 2.6                                   | 13.7                         |
| Ce <sub>0.9</sub> Mn <sub>0.1</sub> O <sub>x</sub>   | 92.8                                  | 7.2                                   | 13.5                         |
| Ce <sub>0.75</sub> Mn <sub>0.25</sub> O <sub>x</sub> | 66.5                                  | 33.5                                  | 11.3                         |
| Ce <sub>0.5</sub> Mn <sub>0.5</sub> O <sub>x</sub>   | 41.3                                  | 58.7                                  | 5.7                          |
| Ce <sub>0.25</sub> Mn <sub>0.75</sub> O <sub>x</sub> | 36.7                                  | 63.3                                  | 11.9                         |
| MnO <sub>x</sub>                                     | 0                                     | 100.0                                 | 6.7                          |

**Table S3:** Rate of reaction normalised to surface area for Ce<sub>0.25</sub>Mn<sub>0.75</sub>O<sub>x</sub> catalyst prepared by different techniques.

| Catalyst                              | Surface area normalised propane total oxidation rate at 300 °C ( $10^{-8}$ ) ( $\text{mol s}^{-1} \text{m}^{-2}$ ) | Surface area normalised naphthalene total oxidation rate at 225 °C ( $10^{-11}$ ) ( $\text{mol s}^{-1} \text{m}^{-2}$ ) |
|---------------------------------------|--------------------------------------------------------------------------------------------------------------------|-------------------------------------------------------------------------------------------------------------------------|
| Mechanochemical grinding – carbonates | 2.59                                                                                                               | 0.90                                                                                                                    |
| Mechanochemical grinding – nitrates   | 2.72                                                                                                               | 1.09                                                                                                                    |
| Urea co-precipitation                 | 3.40                                                                                                               | 1.25                                                                                                                    |
| Oxalic acid                           | 0.92                                                                                                               | 0.86                                                                                                                    |
| Citric acid co-precipitation          | 9.07                                                                                                               | 3.15                                                                                                                    |
